# Supplementary material for: Loss of patched and disruption of granule cell development in a pre-neoplastic stage of medulloblastoma
Source: Oxford University Press journal article supplement (doi:10.1242/dev.01793), 2005-04-20
Supplement: dev01793supptable.pdf [file dev01793supptable.pdf]

**Table S1. Phenotype of GCPs, pre-neoplastic cells and tumor cells from *patched* mutant mice**

|              | GCP | Pre-neoplastic | Tumor |
|--------------|-----|----------------|-------|
| Math-1 (GFP) | 91  | 87             | 95    |
| Psa-Ncam     | 68  | 31             | 80    |
| Zic-1        | 90  | 35             | 77    |
| TUJ1         | 10  | 77             | 39    |
| A2B5         | 79  | 85             | 85    |
| O4           | 2   | 15             | 7     |
| GFAP         | 4   | 4              | 4     |
| Nestin       | 2   | 2              | 3     |
| CD133        | 2   | 0              | 0     |

Cells were isolated and either stained with antibodies against surface markers (CD133/prominin, O4, PSA-NCAM, A2B5) and analyzed by flow cytometry, or allowed to adhere to coverslips and stained with antibodies to intracellular markers (TuJ1, NeuN, Math1, Zic1, Nestin, GFAP) and analyzed by immunofluorescence microscopy. Numbers indicate the percentage of positive cells determined by flow cytometry or by counting and averaging 3-4 fields from three independent samples of each cell type.
